# Supplementary material
Source: Elsevier journal article supplement (https://www.sciencedirect.com/science/article/pii/S1413867018300564)
Supplement: mmc1 [file S1413867018300564:mmc1.doc]

**Supplementary material**

**Supplementary material 1 – Sustained Virological Response of genotype 3 patients according to treatment duration and presence/absence of cirrhosis**

| SOF + DAC ±RBV | 12 weeks | | 24 weeks | |
| --- | --- | --- | --- | --- |
| Cirrhotic | Non-cirrhotic | Cirrhotic | Non-cirrhotic |
| 25/30 (83.3) | 15/17 (88) | 3/3 (100) | 1/1 (100) |

Note: P > 0.05 in all analysis.
