# Supplementary material
Source: Elsevier journal article supplement (https://www.sciencedirect.com/science/article/pii/S1413867018300564)
Supplement: mmc3 [file S1413867018300564:mmc3.doc]

**Supplementary material 3.** Rapid virological response (RVR) and end of treatment response (EOTr)

Abbreviations**:** DAC, daclatasvir; EOTr, end of treatment response; GT, genotype; RBV, ribavirin; RVR, rapid virological response; SOF, sofosbuvir; SMV, simeprevir.

| Outcome | Treatment | Overall | GT1 unspecified | GT1a | GT1b | GT3 | Cirrhotic | Non-cirrhotic |
| --- | --- | --- | --- | --- | --- | --- | --- | --- |
| RVR | SOF + DAC ± RBV | 94.0% (74/78) | 100% (12/12) | 100% (16/16) | 93.7% (15/16) | 90.6% (29/32) | 93.8% (30/32) | 100% (24/24) |
| SOF + SMV ± RBV | 89.0% (42/47) | 100% (4/4) | 95.0% (23/24) | 74.0% (14/18) | - | 100%(12/12) | 91.0% (21/23) |
| EOTr | SOF + DAC ± RBV | 90.0% (64/71) | 91.6% (11/12) | 90.0% (9/10) | 100% (21/21) | 82.0% (23/28) | 96.0% (28/29) | 77.7% (7/9) |
| SOF + SMV ± RBV | 100% (19/19) | 100% (3/3) | 100% (9/9) | 100% (7/7) | - | 100% (6/6) | 100% (6/6) |
